# Supplementary material for: Eukaryotic elongation factor 2 is a prognostic marker and its kinase a potential therapeutic target in HCC
Source: PubMed Central journal article supplement (PMC5355317; doi:10.18632/oncotarget.14447), 2017-01-02
Supplement: oncotarget-08-11950-s001.pdf [file oncotarget-08-11950-s001.pdf]

# Eukaryotic elongation factor 2 is a prognostic marker and its kinase a potential therapeutic target in HCC

## SUPPLEMENTARY FIGURES AND TABLES

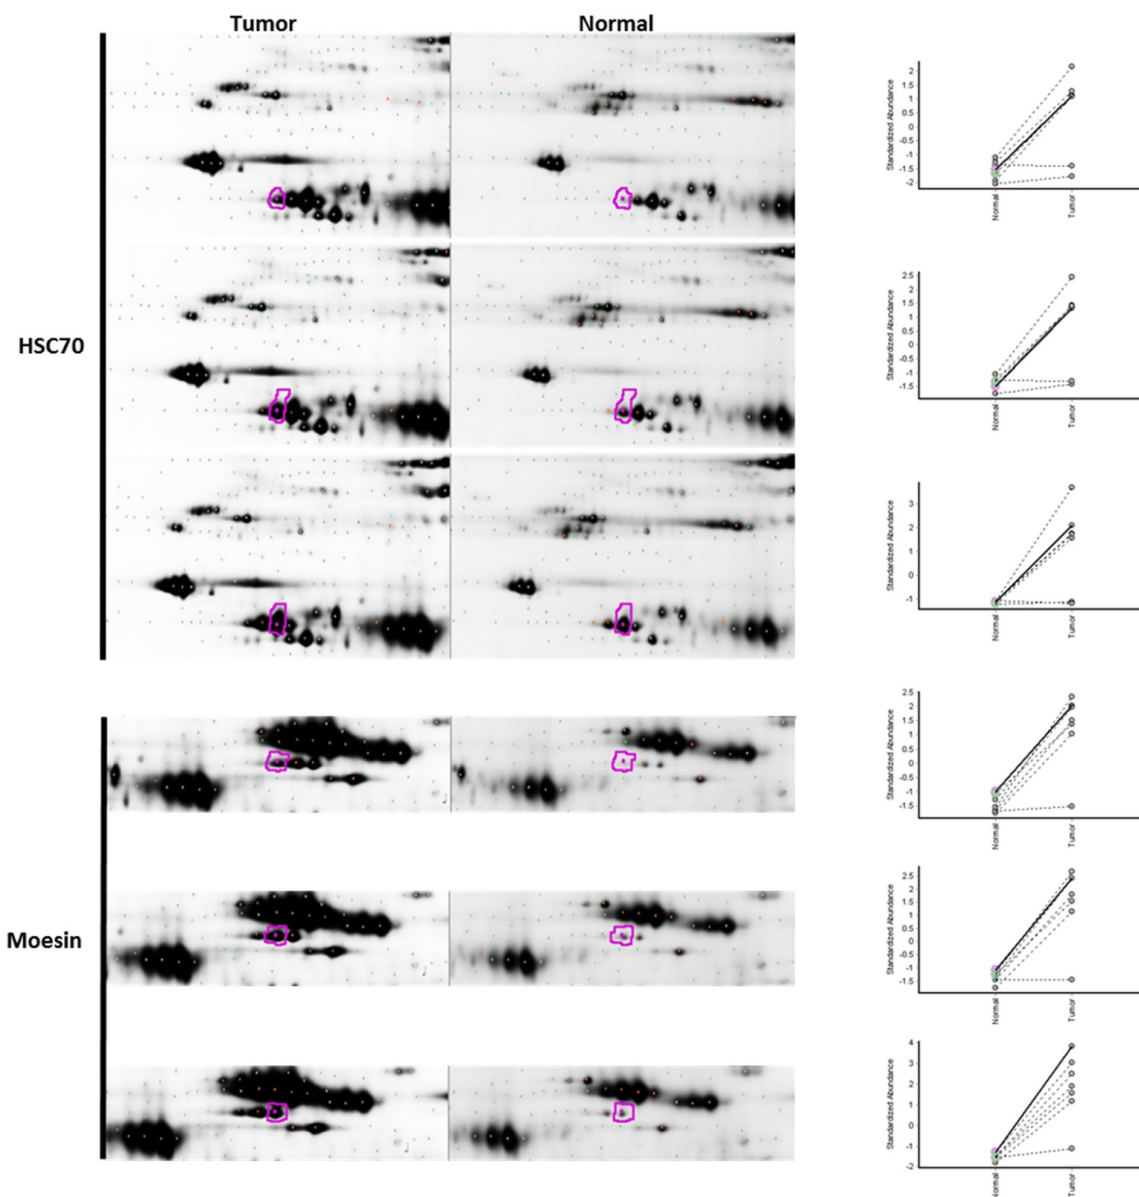

**Supplementary Figure 1: The spots of the two candidate proteins HSC70 and Moesin resulting from 2D DIGE analysis of corresponding phosphoprotein-enriched non-tumorous and HCC liver tissue of 7 HCC patients.** Representative spots (marked in pink) of HSC70 (spots 522, 524 and 531) and Moesin (spots 466, 467 and 468) in non-tumorous (normal, right part) and corresponding HCC (tumor, left part) liver tissue lysate, enriched for phosphoproteins, of one HCC-patient. The graph on the right shows the normalized expression levels of the corresponding phosphoprotein-enriched non-tumorous and tumorous liver lysates of all 7 HCC-patients, which were analyzed in this study.

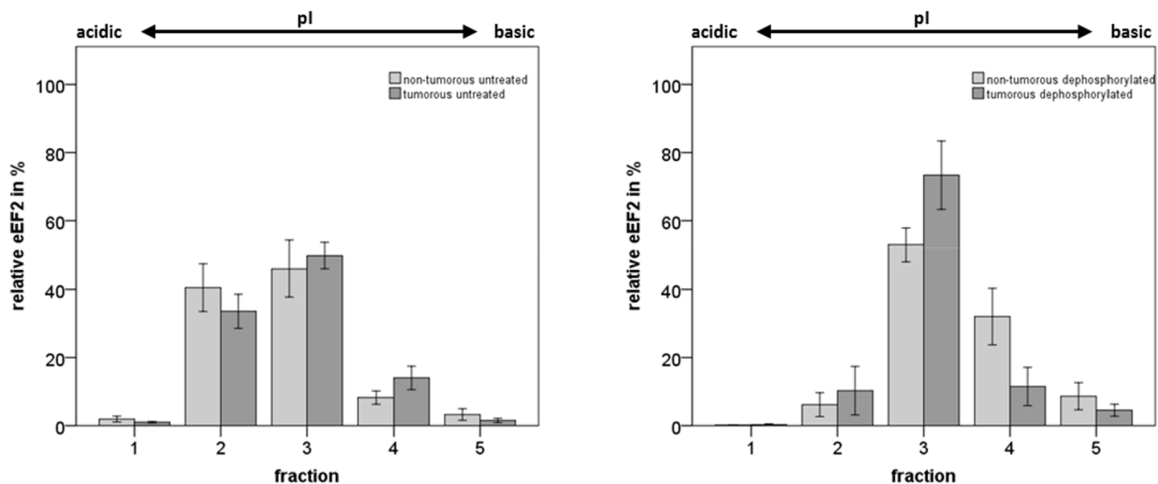

**Supplementary Figure 2: Analysis of the general phosphorylation state of eEF2 in total protein lysates of non-tumorous and HCC liver tissues.** Off-gel fractionation and subsequent immunoblotting of the obtained fractions with densitometric determination of the relative protein distribution in the fractions before and after treatment with lambda protein-phosphatase were performed. In general, after dephosphorylation a shift of the relative protein distribution in the fractions towards a more basic pI due to the loss of negatively charged groups could be observed for eEF2. The effect was detectable between untreated and dephosphorylated as well as between non-tumorous and tumorous lysates. Data shown are mean  $\pm$  SE.

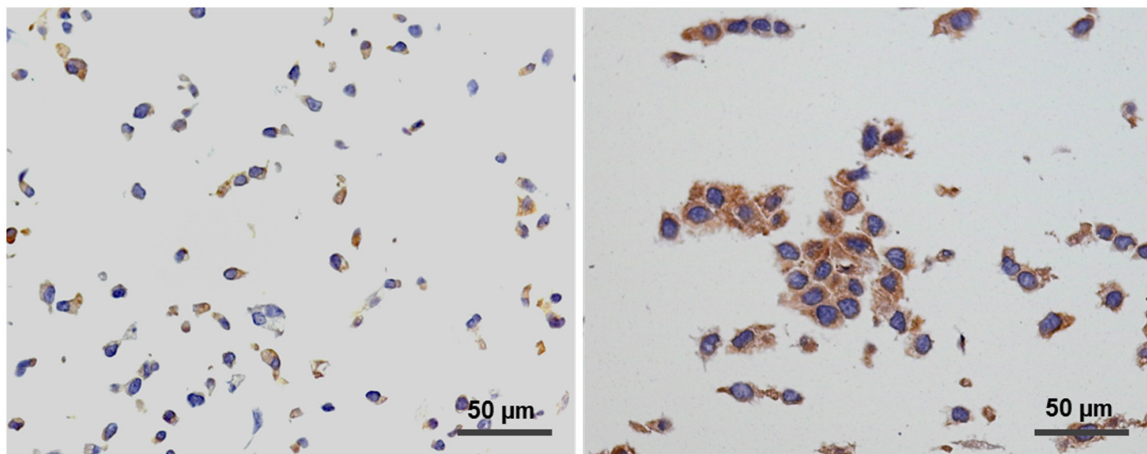

**Supplementary Figure 3: Control cells (left panel) and eEF2K<sup>-/-</sup> cells (right panel) were harvested, formalin-fixed and pelleted in agarose. 1 μm specimens were immunohistochemically stained against C-terminal eEF2. The cytosolic staining is clearly visible in both cell types. No nuclear staining could be observable.**

**Supplementary Table 1: List of the quantified spots revealed by 2D DIGE and their MALDI TOF protein identification**

See Supplementary File 1

**Supplementary Table 2: Primary antibodies used in this study (\* Immunohistochemistry, # Immunoblot)**

| <b>Antigen</b>        | <b>Delivery</b>            | <b>Dilution</b> | <b>Application</b> |
|-----------------------|----------------------------|-----------------|--------------------|
| eEF2                  | Abcam                      | 1:400           | IHC*               |
| peEF2(T56)            | Cell Signaling Techn.      | 1:200           | IHC                |
| HSC70                 | Abcam                      | 1:75            | IHC                |
| Moesin                | Abcam                      | 1:500           | IHC                |
| pEzrin-Radixin-Moesin | Cell Signaling Techn.      | 1:25            | IHC                |
| Ki67                  | Acris                      | 1:200           | IHC                |
| eEF2                  | Abcam                      | 1:10000         | IB#                |
| peEF2(T56)            | Cell Signaling Techn.      | 1:8000          | IB                 |
| eEF2 kinase           | Abcam                      | 1:2000          | IB                 |
| Cyclin D1             | Cell Signaling Techn.      | 1:4000          | IB                 |
| ERK1/2                | Cell Signaling Techn.      | 1:5000          | IB                 |
| pERK1/2 (T202,Y204)   | Cell Signaling Techn.      | 1:4000          | IB                 |
| pERK(T188)            | Provided by K. Lorenz [36] | 1:1500          | IB                 |
